# Supplementary material
Source: Royal Society of Chemistry journal article supplement (doi:10.1039/d6np00013d)
Supplement: d6np00013d1.pdf [file d6np00013d1.pdf]

1 **Supplementary information**

2 **From Gene Discovery to Synthetic Biology: Recent Advances in the Biosynthesis of**  
3 **Oleanane -Type Pentacyclic Triterpenoids**

4 Ismail Abdelsamad<sup>a,b</sup>, Mohamed Abdulbagi<sup>c</sup>, Jingya Wang<sup>a</sup>, Zheyong Xue<sup>d\*</sup>, Xu Lu<sup>a,e\*</sup>

5 <sup>a</sup>State Key Laboratory of Natural Medicines, School of Traditional Chinese Pharmacy, China  
6 Pharmaceutical University, Nanjing, 210009, China.

7 <sup>b</sup>Department of Pharmacognosy, Faculty of Pharmacy, University of Khartoum, Khartoum  
8 11111, Sudan.

9 <sup>c</sup>Department of Pharmaceutical Chemistry, Faculty of Pharmacy, University of Khartoum,  
10 Khartoum 11111, Sudan.

11 <sup>d</sup> State Key Laboratory of Rice Biology and Breeding, Northern Center of China National Rice  
12 Research Institute, China National Rice Research Institute, Hangzhou, 311401, China

13 <sup>e</sup>State Key Laboratory for Quality Ensurance and Sustainable Use of Dao-di Herbs, Beijing,  
14 100700, China.

15 \* Correspondence to Xu Lu (Email: luxu666@163.com), Zheyong Xue (xuezheyong@caas.cn).

**Table S1. Oleanane-type Pentacyclic Triterpenoid Biosynthetic Cytochrome P450 Genes**

| <b>Gene Name</b>         | <b>Substrate</b> | <b>Carbon Modification</b> | <b>Heterologous Host</b>                      | <b>Plant Name</b>                 | <b>Compound Name</b> | <b>Reference</b> |
|--------------------------|------------------|----------------------------|-----------------------------------------------|-----------------------------------|----------------------|------------------|
| <b><i>CYP716A244</i></b> | $\beta$ -amyrin  | C-28 oxidation             | <i>S. cerevisiae</i><br><i>N. benthamiana</i> | <i>Eleutherococcus senticosus</i> | Oleanolic acid       | 1                |
| <b><i>CYP716A48</i></b>  | $\beta$ -amyrin  | C-28 oxidation             | <i>S. cerevisiae</i>                          | <i>Olea europaea</i>              | Oleanolic acid       | 2                |
| <b><i>CYP716C80</i></b>  | $\beta$ -amyrin  | C-28 oxidation             | <i>S. cerevisiae</i><br><i>N. benthamiana</i> | <i>Camptotheca acuminata</i>      | Oleanolic acid       | 3                |
| <b><i>CYP716C81</i></b>  | $\beta$ -amyrin  | C-28 oxidation             | <i>S. cerevisiae</i><br><i>N. benthamiana</i> | <i>Camptotheca acuminata</i>      | Oleanolic acid       | 3                |
| <b><i>CYP716C82</i></b>  | $\beta$ -amyrin  | C-28 oxidation             | <i>S. cerevisiae</i><br><i>N. benthamiana</i> | <i>Camptotheca acuminata</i>      | Oleanolic acid       | 3                |
| <b><i>CYP716A254</i></b> | $\beta$ -amyrin  | C-28 oxidation             | <i>S. cerevisiae</i>                          | <i>Anemone flaccida</i>           | Oleanolic acid       | 4                |
| <b><i>CYP716A252</i></b> | $\beta$ -amyrin  | C-28 oxidation             | <i>S. cerevisiae</i><br><i>N. benthamiana</i> | <i>Ocimum basilicum</i>           | Oleanolic acid       | 5                |

|                    |                |                    |                                               |                                                           |                                |        |
|--------------------|----------------|--------------------|-----------------------------------------------|-----------------------------------------------------------|--------------------------------|--------|
| <b>CYP716A253</b>  | β-amyrin       | C-28 oxidation     | <i>S. cerevisiae</i><br><i>N. benthamiana</i> | <i>Ocimum basilicum</i>                                   | Oleanolic acid                 | 5      |
| <b>CYP716A265</b>  | β-amyrin       | C-28 oxidation     | <i>S. cerevisiae</i>                          | <i>Lagerstroemia speciose</i>                             | Oleanolic acid                 | 6      |
| <b>CYP716A266</b>  | β-amyrin       | C-28 oxidation     | <i>S. cerevisiae</i>                          | <i>Lagerstroemia speciose</i>                             | Oleanolic acid                 | 6      |
| <b>CYP716A12</b>   | β-amyrin       | C-28 oxidation     | <i>S. cerevisiae</i>                          | <i>Medicago truncatula</i>                                | Oleanolic acid                 | 7      |
| <b>CYP716A52v2</b> | β-amyrin       | C-28 oxidation     | <i>S. cerevisiae</i>                          | <i>Panax ginseng</i>                                      | Oleanolic acid                 | 8      |
| <b>CYP716A75</b>   | β-amyrin       | C-28 oxidation     | <i>S. cerevisiae</i>                          | <i>Maesa lanceolata</i>                                   | Erythrodiol,<br>Oleanolic acid | 9      |
| <b>CYP716A233</b>  | β-amyrin       | C-28 oxidation     | <i>S. cerevisiae</i><br><i>N. benthamiana</i> | <i>Terminalia arjuna</i>                                  | Oleanolic acid                 | 10     |
| <b>CYP716A432</b>  | β-amyrin       | C-28 oxidation     | <i>S. cerevisiae</i><br><i>N. benthamiana</i> | <i>Terminalia arjuna</i>                                  | Oleanolic acid                 | 10     |
| <b>LmOAS1</b>      | β-amyrin       | C-28 oxidation     | <i>S. cerevisiae</i>                          | <i>Lonicera macranthoides</i><br><i>Lonicera japonica</i> | Oleanolic acid                 | 11, 12 |
| <b>CYP716C49</b>   | Oleanolic acid | C-2α hydroxylation | <i>S. cerevisiae</i>                          | <i>Crataegus pinnatifida</i>                              | Maslinic acid                  | 13     |

|                    |                                                                          |                             |                                               | <i>Centella asiatica</i>      |                                                                                               |    |
|--------------------|--------------------------------------------------------------------------|-----------------------------|-----------------------------------------------|-------------------------------|-----------------------------------------------------------------------------------------------|----|
| <b>CYP716C55</b>   | Oleanolic acid                                                           | C-2 $\alpha$ hydroxylation  | <i>S. cerevisiae</i><br><i>N. benthamiana</i> | <i>Lagerstroemia speciose</i> | Maslinic acid                                                                                 | 6  |
| <b>CYP716C67</b>   | Oleanolic acid                                                           | C-2 $\alpha$ hydroxylation  | <i>N. benthamiana</i>                         | <i>Olea europaea</i>          | Maslinic Acid                                                                                 | 14 |
| <b>CYP716C88</b>   | Oleanolic acid,<br>Hederagenin                                           | C-2 $\alpha$ hydroxylation  | <i>S. cerevisiae</i><br><i>N. benthamiana</i> | <i>Terminalia arjuna</i>      | Maslinic Acid,<br>Arjunolic Acid                                                              | 10 |
| <b>CYP716C89</b>   | Oleanolic acid,<br>Hederagenin,<br>Erythrodiol,<br>Oleanolic<br>aldehyde | C-2 $\alpha$ hydroxylation  | <i>S. cerevisiae</i><br><i>N. benthamiana</i> | <i>Terminalia arjuna</i>      | Maslinic Acid,<br>Arjunolic Acid,<br>Hydroxy<br>erythrodiol,<br>Hydroxy oleanolic<br>aldehyde | 10 |
| <b>CYP716Y1</b>    | $\beta$ -amyrin                                                          | C-16 $\alpha$ hydroxylation | <i>S. cerevisiae</i>                          | <i>Bupleurum falcatum</i>     | 16 $\alpha$ -hydroxy $\beta$ -<br>amyrin                                                      | 7  |
| <b>CYP87D16</b>    | $\beta$ -amyrin                                                          | C-16 $\alpha$ oxidation     | <i>S. cerevisiae</i>                          | <i>Maesa lanceolata</i>       | 16 $\alpha$ -hydroxy $\beta$ -<br>amyrin                                                      | 9  |
| <b>CYP714E107a</b> | Oleanolic acid,                                                          | C-23 hydroxylation          | <i>S. cerevisiae</i>                          | <i>Terminalia arjuna</i>      | Hederagenin,                                                                                  | 10 |

|                    |                                                   |                                               |                                               |                              |                                               |    |
|--------------------|---------------------------------------------------|-----------------------------------------------|-----------------------------------------------|------------------------------|-----------------------------------------------|----|
|                    | Maslinic acid,<br>Arjunic acid                    |                                               | <i>N. benthamiana</i>                         |                              | Arjunolic acid,<br>Arjungenin                 |    |
| <b>CYP714E107b</b> | Oleanolic acid,<br>Maslinic acid,<br>Arjunic acid | C-23 hydroxylation                            | <i>S. cerevisiae</i><br><i>N. benthamiana</i> | <i>Terminalia arjuna</i>     | Hederagenin,<br>Arjunolic acid,<br>Arjungenin | 10 |
| <b>CYP714E107a</b> | Hederagenin                                       | C-23 oxidation                                | <i>S. cerevisiae</i><br><i>N. benthamiana</i> | <i>Terminalia arjuna</i>     | Gypsogenic acid                               | 10 |
| <b>CYP714E107b</b> | Hederagenin                                       | C-23<br>oxidation                             | <i>S. cerevisiae</i><br><i>N. benthamiana</i> | <i>Terminalia arjuna</i>     | Gypsogenic acid                               | 10 |
| <b>CYP93E2</b>     | $\beta$ -amyrin                                   | C-24 hydroxylation                            | <i>S. cerevisiae</i>                          | <i>Medicago truncatula</i>   | 24-OH- $\beta$ -amyrin                        | 15 |
| <b>CYP72A61V2</b>  | 24-OH- $\beta$ -amyrin                            | Oxidation for<br>Soyasapogenol B<br>synthesis | <i>S. cerevisiae</i>                          | <i>Medicago truncatula</i>   | Soyasapogenol B                               | 15 |
| <b>CYP93E3</b>     | $\beta$ -amyrin                                   | C-24 hydroxylation                            | <i>S. cerevisiae</i>                          | <i>Glycyrrhiza uralensis</i> | 24-OH- $\beta$ -amyrin                        | 15 |
| <b>CYP72A566</b>   | 24-OH- $\beta$ -amyrin                            | Oxidation for<br>Soyasapogenol B<br>synthesis | <i>S. cerevisiae</i>                          | <i>Glycyrrhiza uralensis</i> | Soyasapogenol B                               | 15 |

|                           |                     |                     |                       |                                |                                                |    |
|---------------------------|---------------------|---------------------|-----------------------|--------------------------------|------------------------------------------------|----|
| <b><i>CYP82AS1</i></b>    | β-amyrin            | C-22 Hydroxylation  | <i>S. cerevisiae</i>  | <i>Tripterygium wilfordii</i>  | 22-Hydroxy-β-amyrin                            | 16 |
| <b><i>CYP712K1</i></b>    | 22-Hydroxy-β-amyrin | C-29 Carboxylation  | <i>S. cerevisiae</i>  | <i>Tripterygium wilfordii</i>  | Abrusgenic acid                                | 16 |
| <b><i>CYP712K2/K3</i></b> | β-amyrin            | C-29 Carboxylation  | <i>S. cerevisiae</i>  | <i>Tripterygium wilfordii</i>  | 3-Epikatonc acid                               | 16 |
| <b><i>CYP716A12</i></b>   | β-amyrin            | C-28 Oxidation      | <i>N. benthamiana</i> | <i>Medicago truncatula</i>     | Oleanolic acid                                 | 17 |
| <b><i>CYP716E60</i></b>   | β-amyrin            | C6-β hydroxylation  | <i>S. cerevisiae</i>  | <i>Enkianthus chinensis</i>    | 6β -Hydroxy-β-amyrin                           | 18 |
| <b><i>CYP716C80</i></b>   | β-amyrin            | C2α-hydroxylation   | <i>S. cerevisiae</i>  | <i>Enkianthus chinensis</i>    | 2α-Hydroxy-β-amyrin                            | 18 |
| <b><i>CYP716A862</i></b>  | β-amyrin            | C28 oxidation       | <i>S. cerevisiae</i>  | <i>Enkianthus chinensis</i>    | Oleanolic acid                                 | 18 |
| <b><i>CYP716A262</i></b>  | β-amyrin            | C28 oxidation       | <i>S. cerevisiae</i>  | <i>Psammosilene tunicoides</i> | Oleanolic acid                                 | 19 |
| <b><i>CYP716A262</i></b>  | Oleanolic acid      | C16α hydroxylation, | <i>S. cerevisiae</i>  | <i>Psammosilene tunicoides</i> | Echinocystic Acid                              | 19 |
| <b><i>CYP72A567</i></b>   | Oleanolic acid      | C23 oxidation       | <i>S. cerevisiae</i>  | <i>Psammosilene tunicoides</i> | Hederagenin,<br>Gypsogenin,<br>Gypsogenic acid | 19 |

|                                                          |                 |                             |                      |                                                                                         |                                                                                    |    |
|----------------------------------------------------------|-----------------|-----------------------------|----------------------|-----------------------------------------------------------------------------------------|------------------------------------------------------------------------------------|----|
| <b>CYP716A8</b>                                          | $\beta$ -amyrin | C28 oxidation               | <i>S. cerevisiae</i> | <i>Actinidia eriantha</i>                                                               | Erythrodiol,<br>Oleanolic<br>aldehyde,<br>Oleanolic acid                           | 20 |
| <b>CYP716A9</b>                                          | $\beta$ -amyrin | C28 oxidation               | <i>S. cerevisiae</i> | <i>Actinidia eriantha</i>                                                               | Erythrodiol,<br>Oleanolic<br>aldehyde,<br>Oleanolic acid                           | 20 |
| <b>CYP88A222</b><br><b>CYP88A164</b><br><b>CYP88A108</b> | $\beta$ -amyrin | C11 oxidation               | <i>S. cerevisiae</i> | <i>Melia azedarach</i>                                                                  | 11-oxo- $\beta$ -amyrin                                                            | 21 |
| <b>CYP88D6</b>                                           | $\beta$ -amyrin | C11 oxidation (two<br>step) | <i>S. cerevisiae</i> | <i>Glycyrrhiza uralensis</i><br><i>Glycyrrhiza glabra</i><br><i>Glycyrrhiza inflata</i> | 11-oxo- $\beta$ -amyrin                                                            | 22 |
| <b>CYP88D15</b>                                          | $\beta$ -amyrin | C11 hydroxylation           | <i>S. cerevisiae</i> | <i>Glycyrrhiza pallidiflora</i> ,<br><i>Glycyrrhiza macedonica</i>                      | Oleana-9(11),12-<br>dien-3 $\beta$ -ol,<br>Oleana-11,13(18)-<br>dien-3 $\beta$ -ol | 22 |

|                                              |                |                    |                                                 |                               |                              |    |
|----------------------------------------------|----------------|--------------------|-------------------------------------------------|-------------------------------|------------------------------|----|
| <b><i>CYP716A173</i></b><br><b>(SvC28)</b>   | β-amyrin       | C28 oxidation      | <i>N. benthamiana</i>                           | <i>Saponaria vaccaria</i>     | Oleanolic acid               | 23 |
| <b><i>CYP716A379</i></b><br><b>(SvC16)</b>   | Oleanolic acid | C16α-hydroxylation | <i>N. benthamiana</i> ,<br><i>S. cerevisiae</i> | <i>Saponaria vaccaria</i>     | Echinocystic acid            | 23 |
| <b><i>CYP72A1130</i></b><br><b>(SvC23-1)</b> | Oleanolic acid | C23 oxidation      | <i>N. benthamiana</i> ,<br><i>S. cerevisiae</i> | <i>Saponaria vaccaria</i>     | Gypsogenic acid              | 23 |
| <b><i>CYP72A1131</i></b><br><b>(SvC23-2)</b> | Oleanolic acid | C23 oxidation      | <i>N. benthamiana</i> ,<br><i>S. cerevisiae</i> | <i>Saponaria vaccaria</i>     | Gypsogenic acid              | 23 |
| <b><i>CYP716A12</i></b>                      | β-amyrin       | C28 Oxidation      | <i>Y. lipolytica</i>                            | <i>Medicago truncatula</i>    | Oleanolic acid               | 24 |
| <b><i>CYP716C11</i></b>                      | Oleanolic acid | C-2α hydroxylation | <i>Y. lipolytica</i>                            | <i>Centella asiatica</i>      | Maslinic acid                | 24 |
| <b><i>CYP714E19p</i></b>                     | Maslinic acid  | C-23 hydroxylation | <i>Y. lipolytica</i>                            | <i>Centella asiatica</i>      | Arjunolic acid               | 24 |
| <b><i>CYP714E19p</i></b>                     | Oleanolic acid | C-23 hydroxylation | <i>Y. lipolytica</i>                            | <i>Centella asiatica</i>      | Hederagenin                  | 24 |
| <b><i>CYP716C11p</i></b>                     | Hederagenin    | C-2α hydroxylation | <i>Y. lipolytica</i>                            | <i>Centella asiatica</i>      | Arjunolic acid               | 24 |
| <b><i>CYP716A249</i></b>                     | β-amyrin       | C-28 oxidation     | <i>S. cerevisiae</i>                            | <i>Polygala tenuifolia</i>    | Oleanolic acid               | 25 |
| <b><i>LmOAS1</i></b>                         | β-amyrin       | C28 Carboxylation  | <i>N. benthamiana</i>                           | <i>Lonicera macranthoides</i> | Oleanolic acid, β-<br>amyryn | 11 |

|                   |                 |                   |                      |                      |                                 |    |
|-------------------|-----------------|-------------------|----------------------|----------------------|---------------------------------|----|
| <b>CYP716A212</b> | $\beta$ -amyrin | C28 Hydroxylation | <i>S. cerevisiae</i> | <i>Ilex asprella</i> | Oleanolic acid                  | 26 |
| <b>CYP714E88</b>  | Oleanolic acid  | C23 Hydroxylation | <i>S. cerevisiae</i> | <i>Ilex asprella</i> | Hederagenin,<br>Gypsogenic acid | 26 |
| <b>CYP93A220</b>  | $\beta$ -amyrin | C24 Hydroxylation | <i>S. cerevisiae</i> | <i>Ilex asprella</i> | $\alpha$ -Boswellic acid        | 26 |
| <b>CYP716A261</b> | $\beta$ -amyrin | C28 Hydroxylation | <i>S. cerevisiae</i> | <i>Conyza blinii</i> | Oleanolic acid                  | 27 |

---

**Table S2. Oleanane-type Pentacyclic Triterpenoid Biosynthetic UGT Genes**

| <b>Gene Name</b> | <b>Substrate</b>                                                         | <b>Carbon Modification</b> | <b>Heterologous Host</b>                  | <b>Plant Name</b>        | <b>Compound Name</b>                                                                                                                                                 | <b>Reference</b> |
|------------------|--------------------------------------------------------------------------|----------------------------|-------------------------------------------|--------------------------|----------------------------------------------------------------------------------------------------------------------------------------------------------------------|------------------|
| <i>UGT74AG5</i>  | Oleanolic acid,<br>Hederagenin                                           | C28 O-<br>glucosylation    | <i>E. coli</i>                            | <i>Ilex asprella</i>     | Oleanolic acid 28-O-β-D-<br>glucopyranoside,<br>Hederagenin 28-O-β-D-<br>glucopyranoside                                                                             | 28               |
| <i>UGT74AG11</i> | Oleanolic acid,<br>Hederagenin,<br>Echinocystic acid,<br>calenduloside E | C28-O-<br>glucosylation    | <i>E. coli</i>                            | <i>Hedera helix</i>      | Oleanolic acid 28-O-<br>glucopyranosyl ester,<br>Hederagenin 28-O-<br>glucopyranosyl ester,<br>Echinocystic acid 28-O-<br>glucopyranosyl ester,<br>Chikusetsusaponin | 29               |
| <i>UGT73C11</i>  | Oleanolic acid<br>Hederagenin                                            | C3 glucosylation           | <i>N. benthamiana</i> ,<br><i>E. coli</i> | <i>Barbarea vulgaris</i> | Oleanolic acid 3-O-β-<br>glucoside, Hederagenin 3-<br>O-β-glucoside                                                                                                  | 30               |
| <i>UGT73C13</i>  | Oleanolic acid<br>Hederagenin                                            | C3 glucosylation           | <i>N. benthamiana</i> ,<br><i>E. coli</i> | <i>Barbarea vulgaris</i> | Oleanolic acid 3-O-β-<br>glucoside, Hederagenin 3-<br>O-β-glucoside                                                                                                  | 30               |
| <i>UGT73C21</i>  | Oleanolic acid<br>Hederagenin                                            | C3 glucosylation           | <i>N. benthamiana</i> ,<br><i>E. coli</i> | <i>Barbarea vulgaris</i> | Oleanolic acid 3-O-β-<br>glucoside, Hederagenin 3-<br>O-β-glucoside                                                                                                  | 30               |

|                 |                                |                                                                     |                                           |                          |                                                                                                                                                                                                                                                                                                                               |    |
|-----------------|--------------------------------|---------------------------------------------------------------------|-------------------------------------------|--------------------------|-------------------------------------------------------------------------------------------------------------------------------------------------------------------------------------------------------------------------------------------------------------------------------------------------------------------------------|----|
| <b>UGT73C22</b> | Oleanolic acid,<br>Hederagenin | C28 glucosylation,<br>C3 and C28<br>glucosylation                   | <i>N. benthamiana</i> ,<br><i>E. coli</i> | <i>Barbarea vulgaris</i> | Oleanolic acid 28-O- $\beta$ -<br>glucoside, Oleanolic acid<br>3,28-O- $\beta$ -diglucoside,<br>Hederagenin 28-O- $\beta$ -<br>glucoside, Hederagenin<br>3,28-O- $\beta$ -diglucoside                                                                                                                                         | 30 |
| <b>UGT73C23</b> | Oleanolic acid,<br>Hederagenin | C3, C28 and 3,23<br>glucosylation, C3<br>and C28<br>diglucosylation | <i>N. benthamiana</i> ,<br><i>E. coli</i> | <i>Barbarea vulgaris</i> | Oleanolic acid 3,28-O- $\beta$ -<br>diglucoside, Hederagenin<br>3,28-O- $\beta$ -diglucoside,<br>Hederagenin 3,23-O- $\beta$ -<br>diglucoside                                                                                                                                                                                 | 30 |
| <b>UGT73C25</b> | Oleanolic acid,<br>Hederagenin | C3, C28 and 3,23<br>glucosylation, C3<br>and C28<br>diglucosylation | <i>N. benthamiana</i> ,<br><i>E. coli</i> | <i>Barbarea vulgaris</i> | Oleanolic acid 3-O- $\beta$ -<br>glucoside, Oleanolic acid<br>28-O- $\beta$ -glucoside,<br>Oleanolic acid 3,28-O- $\beta$ -<br>diglucoside, Hederagenin<br>3-O- $\beta$ -glucoside,<br>hederagenin 28-O- $\beta$ -<br>glucoside, Hederagenin<br>3,28-O- $\beta$ -diglucoside,<br>Hederagenin 3,23-O- $\beta$ -<br>diglucoside | 30 |
| <b>UGT73C26</b> | Oleanolic acid,<br>Hederagenin | C3 glucosylation                                                    | <i>N. benthamiana</i> ,<br><i>E. coli</i> | <i>Barbarea vulgaris</i> | Oleanolic acid 3-O- $\beta$ -<br>glucoside, Hederagenin 3-<br>O- $\beta$ -glucoside                                                                                                                                                                                                                                           | 30 |
| <b>UGT73C27</b> | Oleanolic acid,<br>Hederagenin | C3 glucosylation,                                                   | <i>N. benthamiana</i> ,<br><i>E. coli</i> | <i>Barbarea vulgaris</i> | Oleanolic acid 3-O- $\beta$ -<br>glucoside, Hederagenin 3-                                                                                                                                                                                                                                                                    | 30 |

|                 |                                                                             |                                        |                                        |                                             |                                                                                           |    |
|-----------------|-----------------------------------------------------------------------------|----------------------------------------|----------------------------------------|---------------------------------------------|-------------------------------------------------------------------------------------------|----|
| <i>UGT18</i>    | Calenduloside E,<br>Chikusetsusaponin IVa                                   | C3 glycosylation<br>of glucuronic acid | <i>E. coli</i><br><i>S. cerevisiae</i> | <i>Panax ginseng</i>                        | O- $\beta$ -glucoside<br>Zingibroside R1,<br>Ginsenoside Ro                               | 31 |
| <i>UGT8</i>     | Oleanolic acid,<br>Calenduloside E,<br>Zingibroside R1                      | C28 glucosylation                      | <i>E. coli</i><br><i>S. cerevisiae</i> | <i>Panax ginseng</i>                        | Oleanolic acid 28-O-<br>glucopyranosyl ester,<br>Chikusetsusaponin IVa,<br>Ginsenoside Ro | 31 |
| <i>UGT1</i>     | Oleanolic acid 3-<br>O- $\beta$ -d-<br>glucuronide,<br>Zingibroside R1      | C28 glycosylation                      | <i>E. coli</i>                         | <i>Panax japonicus</i><br><i>var. major</i> | Chikusetsusaponin IVa,<br>Ginsenoside Ro                                                  | 32 |
| <i>UGT2</i>     | Oleanolic<br>acid 3-O- $\beta$ -d-<br>glucuronide,<br>Chikusetsusaponin IVa | C3 glycosylation                       | <i>E. coli</i>                         | <i>Panax japonicus</i><br><i>var. major</i> | Zingibroside R1,<br>Ginsenoside Ro                                                        | 32 |
| <i>PgCSyGT1</i> | Oleanolic acid                                                              | C3<br>glucuronidation                  | <i>S. cerevisiae</i>                   | <i>Panax ginseng</i>                        | Calenduloside E                                                                           | 31 |
| <i>GAT1</i>     | Oleanolic acid                                                              | C3<br>glucuronidation                  | <i>E. coli</i>                         | <i>Panax zingiberensis</i>                  | Oleanolic acid 3-O- $\beta$ -<br>glucuronide                                              | 33 |
| <i>GAT2</i>     | Oleanolic acid                                                              | C3<br>glucuronidation                  | <i>E. coli</i>                         | <i>Panax zingiberensis</i>                  | Oleanolic acid 3-o- $\beta$ -<br>glucuronide                                              | 33 |

|                  |                |                                                 |                                                 |                                   |                                              |    |
|------------------|----------------|-------------------------------------------------|-------------------------------------------------|-----------------------------------|----------------------------------------------|----|
| <b>GAT3</b>      | Oleanolic acid | C3<br>glucuronidation                           | <i>E. coli</i>                                  | <i>Panax<br/>zingiberensis</i>    | Oleanolic acid 3-O- $\beta$ -<br>glucuronide | 33 |
| <b>UGT73P1</b>   | Cauloside A    | C3 rhamnose<br>glycosylation                    | <i>N. benthamiana</i> ,<br><i>E.coli</i>        | <i>Lonicera<br/>macranthoides</i> | $\alpha$ -hederin                            | 11 |
| <b>SvCslG</b>    | Quillaic acid  | C3<br>glucuronidation                           | <i>N. benthamiana</i> ,<br><i>S. cerevisiae</i> | <i>Saponaria<br/>vaccaria</i>     | QA-C3-GICA                                   | 23 |
| <b>SvGalT</b>    | Quillaic acid  | Transfers<br>galactose onto<br>QA-C3-GlcA       | <i>N. benthamiana</i> ,<br><i>S. cerevisiae</i> | <i>Saponaria<br/>vaccaria</i>     | QA-C3-GICA-Gal                               | 23 |
| <b>SvC3XyIT</b>  | Quillaic acid  | Transfers xylose<br>onto QA-C3-<br>GlcA-Gal     | <i>N. benthamiana</i>                           | <i>Saponaria<br/>vaccaria</i>     | QA-C3-GICA-Gal-Xyl                           | 23 |
| <b>Sv46DH</b>    | Quillaic acid  | Converts UDP-<br>glucose into UDP-<br>4K6DG     | <i>N. benthamiana</i>                           | <i>Saponaria<br/>vaccaria</i>     | UDP-4K6DG                                    | 23 |
| <b>SvNMD</b>     | Quillaic acid  | Reduces UDP-<br>4K6DG to form<br>UDP-D-Fucose   | <i>N. benthamiana</i>                           | <i>Saponaria<br/>vaccaria</i>     | UDP-D-Fucose                                 | 23 |
| <b>SvC28FucT</b> | Quillaic acid  | Transfers fucose<br>onto the C28 of<br>saponins | <i>N. benthamiana</i> ,<br><i>S. cerevisiae</i> | <i>Saponaria<br/>vaccaria</i>     | QA-C3-GICA-C28-Fuc                           | 23 |

19

20

**Table S3. Oleanane-type Pentacyclic Triterpenoid Biosynthetic Transcription Factors**

| <b>TF Family</b> | <b>TF Name(s)</b>     | <b>Species</b>               | <b>Metabolite</b>                     | <b>Target gene /promotor</b>                 | <b>Promotor-binding site</b> | <b>Reference</b> |
|------------------|-----------------------|------------------------------|---------------------------------------|----------------------------------------------|------------------------------|------------------|
| <b>WRKY</b>      | PgWRKY4               | <i>Panax ginseng</i>         | Gensenoside saponins                  | <i>PgSE</i>                                  | W-box                        | 34               |
| <b>R2R3-MYB</b>  | PnMYB4<br>PnMYB1      | <i>Panax notoginseng</i>     | Saponins                              | <i>PnSQS, PnSE, PnDS</i>                     | MYB                          | 35               |
| <b>bHLH</b>      | PnbHLH                | <i>Panax notoginseng</i>     | Saponins                              | <i>PnSQS, PnSE, PnDS</i>                     | MYB                          | 35               |
| <b>bHLH</b>      | TaMYC2                | <i>Taraxacum antungense</i>  | Taraxerol                             | <i>TaSQS</i>                                 | E-box                        | 36               |
| <b>bHLH</b>      | TSAR1, TSAR2          | <i>Medicago truncatula</i>   | Pentacyclic oleanane type soyasaponin | <i>MtHMGR1</i>                               | N-box                        | 37               |
| <b>bHLH</b>      | GibHLH13              | <i>Glycyrrhiza inflata</i>   | Glycyrrhizin                          | <i>Giβ-AS, GiCYP72A154<br/>GiCSyGT</i>       | E-box                        | 38               |
| <b>bHLH</b>      | GubHLH3               | <i>Glycyrrhiza uralensis</i> | Soyasaponins / Soyasapogenol B        | <i>Guβ-AS, GuCYP93E3,<br/>GuCYP72A566</i>    | E-box N-box                  | 39               |
| <b>MADS-box</b>  | PgMADS41,<br>PgMADS44 | <i>Panax ginseng</i>         | Ginsenoside Ro                        | <i>PgSE-4, Pgβ-AS-13<br/>PgCYP716A52v2-4</i> | CArG motif                   | 40               |
| <b>WRKY</b>      | CoWRKY15              | <i>Camellia oleifera</i>     | Oleanane-type triterpenoid saponins   | <i>CoSQS</i>                                 | W-box                        | 41               |

|                |                    |                        |                                 |                                               |         |    |
|----------------|--------------------|------------------------|---------------------------------|-----------------------------------------------|---------|----|
| <b>WRKY</b>    | ZjWRKY18           | <i>Ziziphus jujuba</i> | Oleanolic acid                  | <i>ZjHMGR1</i>                                | W-box   | 42 |
| <b>WRKY</b>    | CbWRKY24           | <i>Conyza bilinii</i>  | Saponins                        | <i>CbβAS</i>                                  | W-box   | 43 |
| <b>MYB</b>     | ZjMYB39,<br>ZjMYB4 | <i>Ziziphus jujube</i> | Ziziphine                       | <i>ZjFPS</i><br><i>ZjSQS</i>                  | MYB     | 44 |
| <b>AP2/ERF</b> | PjERF1             | <i>Panax japonicas</i> | Chikusetsusaponin<br>IV and IVa | <i>PjβAS</i> , <i>PjCAS</i> , and <i>PjSE</i> | GCC-box | 45 |

**Table S4. Advantage and limitation analysis of different host systems for OPTs heterologous production**

| <b>Host Category</b> | <b>Key Examples</b> | <b>Major Advantages</b> | <b>Major Limitations / Liabilities</b> |
|----------------------|---------------------|-------------------------|----------------------------------------|
|----------------------|---------------------|-------------------------|----------------------------------------|

|                                           |                                                                                             |                                                                                                                                                                                                                                                                                                                                                                                                                               |                                                                                                                                                                                                                                                                                                                                                                          |
|-------------------------------------------|---------------------------------------------------------------------------------------------|-------------------------------------------------------------------------------------------------------------------------------------------------------------------------------------------------------------------------------------------------------------------------------------------------------------------------------------------------------------------------------------------------------------------------------|--------------------------------------------------------------------------------------------------------------------------------------------------------------------------------------------------------------------------------------------------------------------------------------------------------------------------------------------------------------------------|
| <b>Native Plants</b>                      | <i>Lotus japonicas</i> ,<br><i>Olea europaea</i>                                            | <b>Native Pathway Fidelity:</b><br>All endogenous enzymes, cofactors, organelles, and regulatory networks are present, enabling the synthesis of highly complex, modified OPTs.                                                                                                                                                                                                                                               | <b>Low &amp; Variable Yield:</b><br>OPT accumulation is often low, tissue-specific, and influenced by environment/stress.<br><b>Complex Extraction:</b> Mixtures of structural analogs complicate purification.<br><b>Slow Growth:</b> Long life cycles hinder rapid research and scaling.                                                                               |
| <b>Heterologous Plant Hosts</b>           | <i>Nicotiana benthamiana</i> (transient),<br><i>Medicago truncatula</i> (stable)            | <b>Plant-Compatible Machinery:</b><br>Contains ER, redox partners (CPR), and lipid droplets that support functional expression of plant P450s and channeling.<br><b>Rapid Validation:</b> Transient agroinfiltration (e.g., Tsukuba system) allows ultra-fast (<2 week) pathway assembly and testing.<br><b>High-Performance Potential:</b> Can achieve very high yields per biomass unit (e.g., ~30 mg/g DW oleanolic acid). | <b>Agricultural Scaling:</b> Large-scale production requires significant land, is seasonal, and faces biocontainment/GMO regulations.<br><b>Quantitative Analysis Challenge:</b><br>Complex plant matrix complicates metabolite extraction and analysis compared to microbial systems.                                                                                   |
| <b>Prokaryotic Host (Bacteria)</b>        | <i>Escherichia coli</i>                                                                     | <b>Ultra-Rapid Growth:</b> Fast doubling (~20 min) enables quick genetic iterations.<br><b>High Genetic Tractability:</b> Vast toolkit for cloning, CRISPR, and library construction.<br><b>Defined Metabolism:</b> Simplifies metabolic modeling and omics analysis.                                                                                                                                                         | <b>Lacks Essential Eukaryotic Machinery:</b><br>No native sterol pathway, ER, or functional cytochrome P450 reductase (CPR) system. Requires extensive engineering to supply squalene/OS and functionalize P450s.<br><b>Product Toxicity:</b> Hydrophobic intermediates (e.g., $\beta$ -amyrin) often accumulate intracellularly, inhibiting growth and limiting titers. |
| <b>Eukaryotic Microbial Hosts (Yeast)</b> | <i>Saccharomyces cerevisiae</i> ,<br><i>Yarrowia lipolytica</i> ,<br><i>Pichia pastoris</i> | <b>Balance of Fidelity &amp; Tractability:</b> Native mevalonate pathway supplies precursors; contains ER and supports functional plant P450/CPR pairs.<br><b>Industrial Workhorse:</b> Excellent for                                                                                                                                                                                                                         | <b>Metabolic Burden:</b> Competition between heterologous pathway and native metabolism (e.g., for ergosterol synthesis) can limit yields. Requires extensive rewiring.                                                                                                                                                                                                  |

---

scalable fermentation in bioreactors;  
GRAS status for pharmaceuticals.

**Advanced Engineering:** Sophisticated tools for dynamic regulation, organelle engineering, and high-throughput screening.

**Limited "Drop-in" Success:** Functional expression of some plant P450s or UGTs may require N-terminal engineering or chaperone co-expression.

**Precursor Sequestration:** Native metabolism may divert intermediates (like FPP) away from the OPT pathway.

---

## References

1. H. J. Jo, J. Y. Han, H. S. Hwang and Y. E. Choi, *Phytochemistry*, 2017, **135**, 53-63.
2. H. Suzuki, E. O. Fukushima, N. Umemoto, K. Ohyama, H. Seki and T. Muranaka, *Plant Biotechnol (Tokyo)*, 2018, **35**, 131-139.
3. X. Pu, M. Chen, M. Lei, X. Lin, J. Zhang, Z. Ai, J. He, Y. Liu, S. Yang, H. Wang, J. Liao, L. Zhang and Q. Huang, *Plant Physiol Biochem*, 2023, **202**, 107929.
4. C. Zhan, S. Ahmed, S. Hu, S. Dong, Q. Cai, T. Yang, X. Wang, X. Li and X. Hu, *Biochem. Biophys. Res. Commun.*, 2018, **495**, 1271-1277.
5. R. C. Misra, S. Sharma, Sandeep, A. Garg, C. S. Chanotiya and S. Ghosh, *The New phytologist*, 2017, **214**, 706-720.
6. Sandeep, R. C. Misra, C. S. Chanotiya, P. Mukhopadhyay and S. Ghosh, *New Phytol.*, 2019, **222**, 408-424.
7. T. Moses, J. Pollier, L. Almagro, D. Buyst, M. Van Montagu, M. A. Pedreño, J. C. Martins, J. M. Thevelein and A. Goossens, *Proc. Natl. Acad. Sci. USA*, 2014, **111**, 1634-1639.
8. J. Y. Han, M. J. Kim, Y. W. Ban, H. S. Hwang and Y. E. Choi, *Plant Cell Physiol.*, 2013, **54**, 2034-2046.
9. T. Moses, J. Pollier, A. Faizal, S. Apers, L. Pieters, J. M. Thevelein, D. Geelen and A. Goossens, *Mol. Plant*, 2015, **8**, 122-135.
10. G. Srivastava, P. Vyas, A. Kumar, A. Singh, P. Bhargav, S. Dinday and S. Ghosh, *Plant J.*, 2024, **119**, 2687-2705.
11. X. Yin, Y. Xiang, F.-Q. Huang, Y. Chen, H. Ding, J. Du, X. Chen, X. Wang, X. Wei, Y.-Y. Cai, W. Gao, D. Guo, R. N. Alolga, X. Kan, B. Zhang, G. Alejo-Jacuinde, P. Li, L.-S. P. Tran, L. Herrera-Estrella, X. Lu and L.-W. Qi, *Plant Biotechnol. J.*, 2023, **21**, 2209-2223.
12. X. Yin, Y. Xiang, F. Q. Huang, Y. Chen, H. Ding, J. Du, X. Chen, X. Wang, X. Wei, Y. Y. Cai, W. Gao, D. Guo, R. N. Alolga, X. Kan, B. Zhang, G. Alejo-Jacuinde, P. Li, L. P. Tran, L. Herrera-Estrella, X. Lu and L. W. Qi, *Plant Biotechnol J*, 2023, **21**, 2209-2223.
13. Z. Dai, Y. Liu, Z. Sun, D. Wang, G. Qu, X. Ma, F. Fan, L. Zhang, S. Li and X. Zhang, *Metab Eng*, 2019, **51**, 70-78.
14. F. Alagna, J. Reed, O. Calderini, R. Thimmappa, N. G. M. Cultrera, A. Cattivelli, D. Tagliacruzchi, S. Mousavi, R. Mariotti, A. Osbourn and L. Baldoni, *The New phytologist*, 2023, **238**, 2047-2063.
15. M. Li, M. Zhao, P. Wei, C. Zhang and W. Lu, *Appl Biochem Biotechnol*, 2021, **193**, 3202-3213.
16. Y. Liu, J. Zhou, P. Liu, T. Hu, X. Liu, J. Gao, L. Ma, Y. Lu, D. Li, Z. Jiang, X. Zhang, L. Huang, W. Gao, X. Wu, Y. Zhang and C. Liu, *The New phytologist*, 2024, **241**, 1720-1731.
17. J. Romsuk, S. Yasumoto, E. O. Fukushima, K. Miura, T. Muranaka and H. Seki, *Front. Plant Sci.*, 2022, **13**, 991909.
18. H. Q. Wang, Q. Y. Shi, S. G. Ma and S. S. Yu, *J. Nat. Prod.*, 2024, **87**, 1036-1043.
19. W. Li, X. Ma, G. Li, A. Zhang, D. Wang, F. Fan, X. Ma, X. Zhang, Z. Dai and Z. Qian, *ACS Synth. Biol.*, 2021, **10**, 1874-1881.
20. T. Yang, J. Chen, N. Shi, B. Fan, R. Yi, S. Liang, A. Ji, Z. Liu, C. Li, Q. Wang and L. Duan, *J. Agric. Food Chem.*, 2024, **72**, 27902-27911.
21. X. Su, J. Liu, J. Liu, Q. Xue and C. Wang, *International journal of biological macromolecules*, 2025, **318**, 145362.
22. M. Z. Fanani, S. Sawai, H. Seki, M. Ishimori, K. Ohyama, E. O. Fukushima, H. Sudo, K. Saito and T. Muranaka, *Plant Cell Physiol*, 2021, **62**, 262-271.
23. X. Chen, G. A. Hudson, C. Mineo, B. Amer, E. E. K. Baidoo, S. A. Crowe, Y. Liu, J. D. Keasling and H. V. Scheller, *Nat Commun*, 2023, **14**, 7101.

24. J. A. Arnesen, A. Belmonte Del Ama, S. Jayachandran, J. Dahlin, D. Rago, A. J. C. Andersen and I. Borodina, *Metab. Eng. Commun.*, 2022, **14**, e00197.
25. F. S. Zhang, X. Zhang, Q. Y. Wang, Y. J. Pu, C. H. Du, X. M. Qin, H. L. Tian, Y. L. Lian, M. S. Li, Y. Chen and C. G. Ma, *Biol Pharm Bull*, 2020, **43**, 1839-1846.
26. L. Li, S. Lin, Y. Chen, Y. Wang, L. Xiao, X. Ye, L. Sun, R. Zhan and H. Xu, *Frontiers in plant science*, 2022, **13**, 831401.
27. R. Sun, J. L. Gao, H. Chen, S. Liu and Z. Z. Tang, *Mol Biol (Mosk)*, 2020, **54**, 813-825.
28. X. Ji, S. Lin, Y. Chen, J. Liu, X. Yun, T. Wang, J. Qin, C. Luo, K. Wang, Z. Zhao, R. Zhan and H. Xu, *Frontiers in plant science*, 2020, **11**, 612.
29. H. Yu, J. Zhou, J. Zhang, X. He, S. Peng, H. Ling, Z. Dong, X. Lu, Y. Tian, G. Guan, Q. Tang, X. Zhong and Y. He, *Int J Mol Sci*, 2024, **25**, 4067.
30. P. Erthmann, N. Agerbirk and S. Bak, *Plant Mol. Biol.*, 2018, **97**, 37-55.
31. H. Zhang, X. Hua, D. Zheng, H. Wu, C. Li, P. Rao, M. Wen, Y.-E. Choi, Z. Xue, Y. Wang and Y. Li, *Journal of agricultural and food chemistry*, 2022, **70**, 2231-2240.
32. J.-R. Tang, G. Chen, Y.-C. Lu, Q.-Y. Tang, W.-L. Song, Y. Lin, Y. Li, S.-F. Peng, S.-C. Yang, G.-H. Zhang and B. Hao, *Planta*, 2021, **253**, 91.
33. Q. Y. Tang, G. Chen, W. L. Song, W. Fan, K. H. Wei, S. M. He, G. H. Zhang, J. R. Tang, Y. Li, Y. Lin and S. C. Yang, *Planta*, 2019, **249**, 393-406.
34. L. Yao, J. Wang, J. Sun, J. He, K.-Y. Paek, S.-Y. Park, L. Huang and W. Gao, *Ind. Crop. Prod.*, 2020, **154**, 112671.
35. J. Man, Y. Shi, Y. Huang, X. Zhang, X. Wang, S. Liu, G. He, K. An, D. Han, X. Wang and S. Wei, *Hortic Res*, 2023, **10**, uhad134.
36. T. Liu, J. Liao, M. Shi, L. Li, Q. Liu, X. Cui, W. Ning and G. Kai, *Plant Sci.*, 2023, **326**, 111506.
37. J. Mertens, J. Pollier, R. Vanden Bossche, I. Lopez-Vidriero, J. M. Franco-Zorrilla and A. Goossens, *Plant Physiol.*, 2016, **170**, 194-210.
38. Y. Li, J. Zeng, J. Zhu, Y. Li and Y. Wang, *Ind. Crop. Prod.*, 2025, **226**, 120732.
39. K. Tamura, K. Yoshida, Y. Hiraoka, D. Sakaguchi, A. Chikugo, K. Mochida, M. Kojoma, N. Mitsuda, K. Saito, T. Muranaka and H. Seki, *Plant Cell Physiol.*, 2018, **59**, 778-791.
40. H. Jiao, Z. Hua, J. Zhou, J. Hu, Y. Zhao, Y. Wang, Y. Yuan and L. Huang, *Int. J. Biol. Macromol.*, 2023, **233**, 123648.
41. A. Li, Q. Du, Y. Zeng, R. Yang, L. Ge, Z. Zhu, C. Li and X. Tan, *Int J Mol Sci*, 2024, **25**, 11134.
42. C. Wen, Z. Zhang, Q. Shi, X. Duan, J. Du, C. Wu and X. Li, *Int. J. Mol. Sci.*, 2023, **24**, 3899.
43. W.-J. Sun, J.-Y. Zhan, T.-R. Zheng, R. Sun, T. Wang, Z.-Z. Tang, T.-L. Bu, C.-L. Li, Q. Wu and H. Chen, *Journal of Genetics*, 2018, **97**, 1379-1388.
44. C. Wen, Z. Zhang, Q. Shi, R. Niu, X. Duan, B. Shen and X. Li, *Journal of agricultural and food chemistry*, 2023, **71**, 4599-4614.
45. Q. Chen, Y. Yu, X. Zhang, R. Zhao, J. Zhang, D. Liu, X. Cui and F. Ge, *Plant Biotechnol. Rep.*, 2021, **15**, 597-607.
